# Supplementary material for: Reversible peptide particle formation using a mini amino acid sequence
Source: Royal Society of Chemistry journal article supplement (doi:10.1039/c0sm00442a), 2010-01-01
Supplement: c0sm00442a.pdf [file c0sm00442a.pdf]

# Reversible peptide particle formation using a mini amino acid sequence

Thomas B. Schuster<sup>a</sup>, Dirk de Bruyn Ouboter<sup>a</sup>, Enrica Bordignon<sup>b</sup>, Gunnar Jeschke<sup>b</sup>, Wolfgang Meier<sup>\*a</sup>

5

## Supporting information

### Materials and methods

#### 10 Gel permeation chromatography (GPC)

Measurements of gramicidin A (gA) and Ac-X<sub>3</sub>-gT (c = 1 mg/mL) were performed on a Shimadzu Prominence HPLC, using an Agilent PLgel column (5 μm, 10<sup>3</sup> Å, 2 x 250 mm) and isocratic elution with THF/10% H<sub>2</sub>O. Stabilizer-free solvent improved detection at the tryptophan adsorption maximum of 280 nm.

#### Tensiometer

Surface tension was measured on a Sigma 703D Tensiometer (KSV Inst., Finland) with a platinum Wilhelmy plate, pre-cleaned with ethanol and water, followed by flame annealing. Solutions were prepared 24 h prior to measurements, which were performed at room temperature.

#### UV-VIS

A Perkin Elmer Lambda 35 UV/VIS Spectrometer, equipped with a Peltier temperature control element and a 1 mm cuvette, was used to detect (280 nm) the onset of scattering due to particle formation.

#### Atomic force microscopy (AFM)

Measurements were carried out using a 5100 Agilent system (formerly PicoLE Molecular Imaging) equipped with a multi-purpose scanner. Images were acquired using a silicon cantilever (type-NCHR PointProbe® Plus, force constant 42 N/m) as indicated by the manufacturer for acoustic mode images. Samples were prepared by exposing aqueous peptide solution to a freshly cleaved mica surface for 2 min, removing the supernatant solution, and drying.

## Results

### Dimersiation probed by GPC

Fig. S1 illustrates GPC elution profiles of Ac-X<sub>3</sub>-gT and gramicidin in THF and EtOH, whereby a clear separation of monomer and dimer was visible as two peaks for gramicidin only. The amphiphilic peptide elution profile was characterized by a slightly broader peak and no indication of distinct dimerisation.

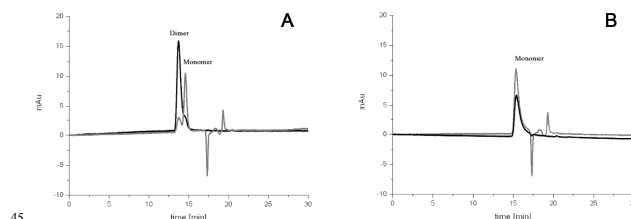

Fig. S1 A) GPC elution profiles of gramicidin mono and dimer, and B) Ac-X<sub>3</sub>-gT monomers in different solvents (THF black line, EtOH gray line)

### Peptide purity and characterisation

Preparative HPLC profiles with the collected fractions for K<sub>3</sub>-gT are presented in Fig. S2.

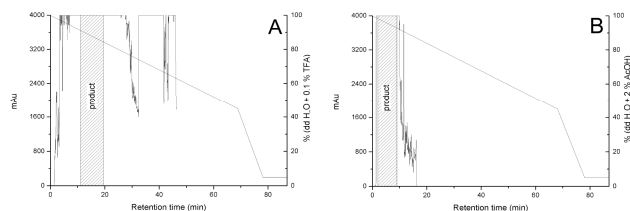

Fig. S2 Preparative HPLC elution profile of K<sub>3</sub>-gT A) first run with ACN/dd H<sub>2</sub>O 0.1% TFA B) second run using ACN/dd H<sub>2</sub>O 2% AcOH

Verification of mass and purity of the collected fractions was analysed by MALDI-ToF-MS and HPLC. Examples are illustrated in Fig. S3.

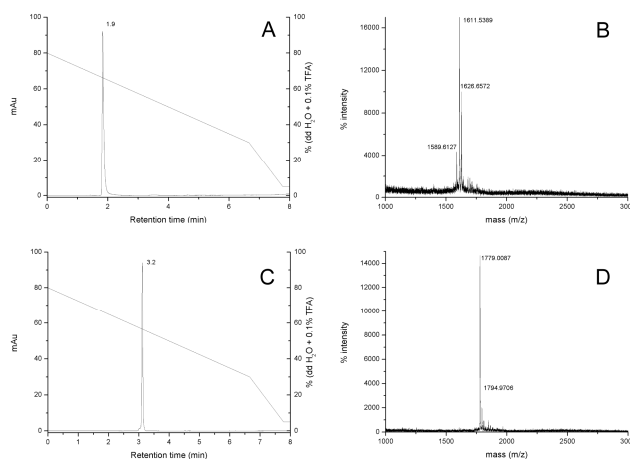

Fig. S3 Analysis of C-K<sub>3</sub>-gT A) HPLC profile B) MALDI-ToF-MS and AcC-X<sub>3</sub>-gT C) HPLC profile D) MALDI-ToF-MS

60

Table S1 presents a summary of the measured mass and purity of the purified compounds.

**Table S1** Verification of mass and purity of the amphiphilic peptides used.

| Code                       | Mass g/mol | Mass (MALDI-ToF-MS) | Purity (Area %, analyt. HPLC) |
|----------------------------|------------|---------------------|-------------------------------|
| K <sub>3</sub> -gT         | 1485,9     | 1486.7              | > 99 %                        |
| C-K <sub>3</sub> -gT       | 1589,9     | 1588.6              | 97 %                          |
| Ac-X <sub>3</sub> -gT      | 1653,9     | 1677.3              | 98 %                          |
| AcC-X <sub>3</sub> -gT     | 1757,9     | 1779.0              | 96 %                          |
| AcC(sl)-X <sub>3</sub> -gT | 1947,0     | 1948.5              | 97 %                          |

5

### Behaviour of C-K<sub>3</sub>-gT as surfactant

Amphiphilic peptides behave like surfactants. It therefore was possible to determine a critical micelle concentration (cmc), as illustrated in Fig. S4).

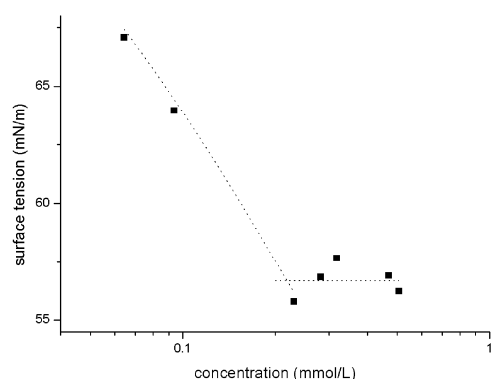

**Fig. S4** Cmc of C-K<sub>3</sub>-gT.

### Self-assembly of C-K<sub>3</sub>-gT into micelles

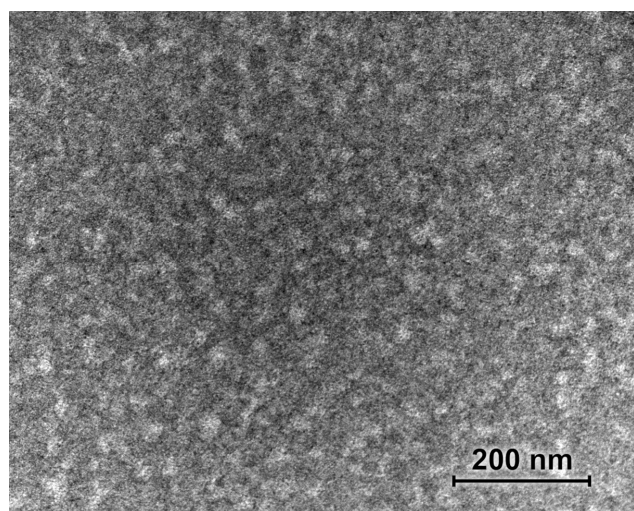

**Fig. S5** Representative TEM image of C-K<sub>3</sub>-gT micelles. The minor peptide bead fraction, which is not present in this micrograph, can be seen in Fig. 2 (blank)

### Peptide bead formation due to charge shielding

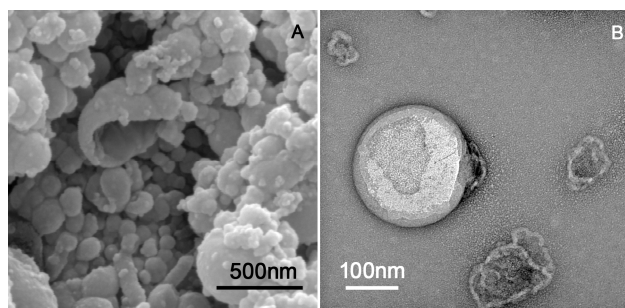

**Fig. S6** A) SEM of C-K<sub>3</sub>-gT with NaH<sub>2</sub>PO<sub>4</sub> (0,025mol/L) B) TEM of AcC-K<sub>3</sub>-gT with NaSCN (0.1mol/L)

20

### Self-assembly of Ac-X<sub>3</sub>-gT

Self-assembled spherical structures - so-called peptide beads - from Ac-X<sub>3</sub>-gT were imaged using SEM, TEM, and AFM (Fig. S7).

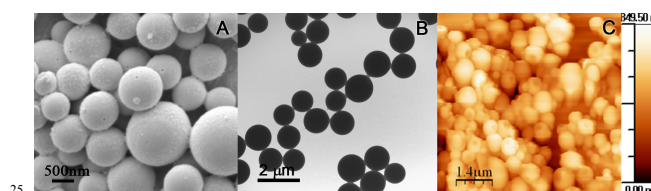

**Fig. S7** A) SEM of Ac-X<sub>3</sub>-gT peptide beads, B) TEM stained with uranyl acetate and C) AFM.

25

### Cw EPR measurements in different ethanol/water mixtures

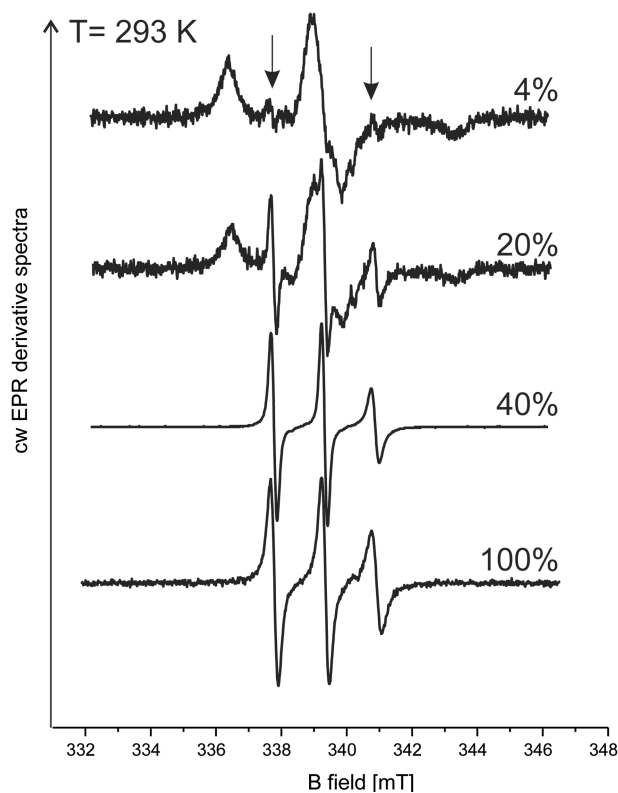

**Fig. S8** cw EPR spectra of AcC-X<sub>3</sub>-gT / AcC(sl)-X<sub>3</sub>-gT mixtures depending of ethanol concentration. Arrows mark the characteristic features of the mobile species, which are getting dominant with increasing ethanol concentration.

10

15

## Correlation functions

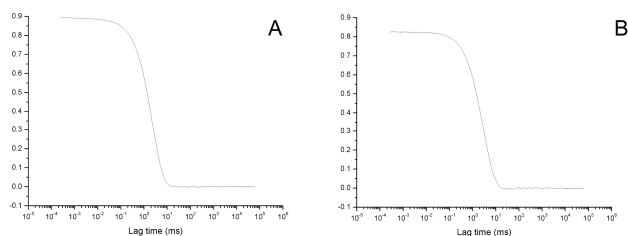

**Fig. S9** Correlation functions of AcC-X<sub>3</sub>-gT/AcC(sI)-X<sub>3</sub>-gT mixture in A) 40 wt % ethanol and B) 4 wt % ethanol

5

## Equilibrium of Ac-X<sub>3</sub>-gT in ethanol mixtures

Equilibrium between micelles and peptide beads arises in ethanol/water mixtures. Converting peptide solutions at 4 wt % ethanol to 40 wt % ethanol and vice versa (using dialysis) always produces the same characteristic DLS signals, proving the reversibility of the system. A diagram of the experiment and the corresponding results are presented in Fig. S7.

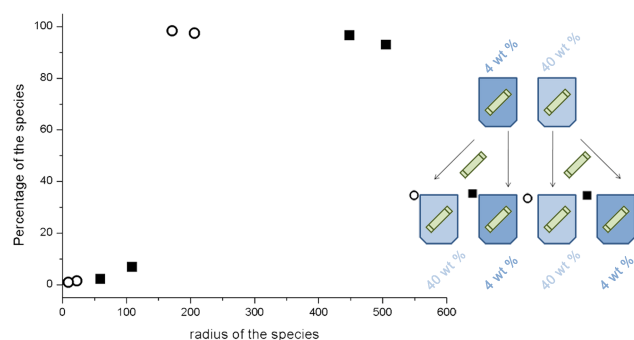

**Fig. S10** Reversibility of the system: Two different starting points (4 wt % and 40 wt %) yield the same DLS features at 4 wt % (■) and at 40 wt % (○) final ethanol content.

## Temperature-dependent self-assembly of Ac-X<sub>3</sub>-gT

The self-assembly process was initiated by solvent exchange from 100 w % to 20 wt % ethanol. A reversible, temperature-dependent peptide bead formation was monitored at that ethanol concentration. Temperature-dependent UV absorption measurements tracked bead formation as absorption increased due to scattering. As Fig. S11 shows, peptid beads begin to assemble below 25 °C at 20 wt % ethanol. This process was reversible. The cooling (black line) - heating (red line) cycle exhibits a slight hysteresis due to the experimental setup.

25

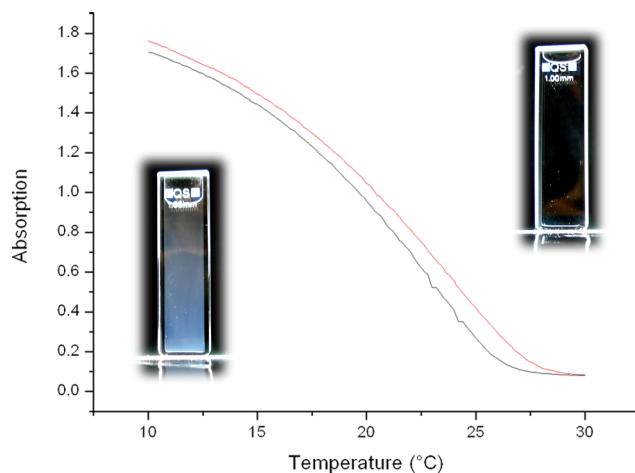

**Fig. S11** UV measurement of temperature-dependent bead formation (heating (red line), cooling (black line)) using Ac-X<sub>3</sub>-gT at 20 wt % EtOH. Photographs were taken at 4 °C (left) and RT (22 °C, right).

## Size dependency of peptide beads in dd H<sub>2</sub>O upon initial peptide concentration

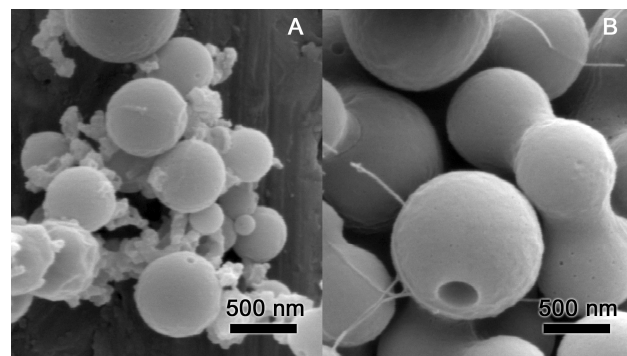

**Fig. S12** SEM micrographs of Ac-X<sub>3</sub>-gT at A) 1.0 mol/L B) 1.5 mol/L

## Notes

<sup>a</sup> Department of Chemistry, University of Basel, Klingelbergstrasse 80, CH- 4056 Basel, Switzerland; E-mail: [wolfgang.meier@unibas.ch](mailto:wolfgang.meier@unibas.ch)

<sup>b</sup> Laboratory for Physical Chemistry, ETH Zürich, Wolfgang-Pauli-Str. 10, CH- 8093 Zürich, Switzerland
